# Supplementary material for: Influence of environmental factors and body condition on the post-oviposition behavior in the emerald glass frog Espadarana prosoblepon (Centrolenidae)
Source: PeerJ journal article supplement (doi:10.7717/peerj.13616), 2022-06-16
Supplement: Supplemental_Figure_1.pdf [file Supplemental_Figure_1.pdf]

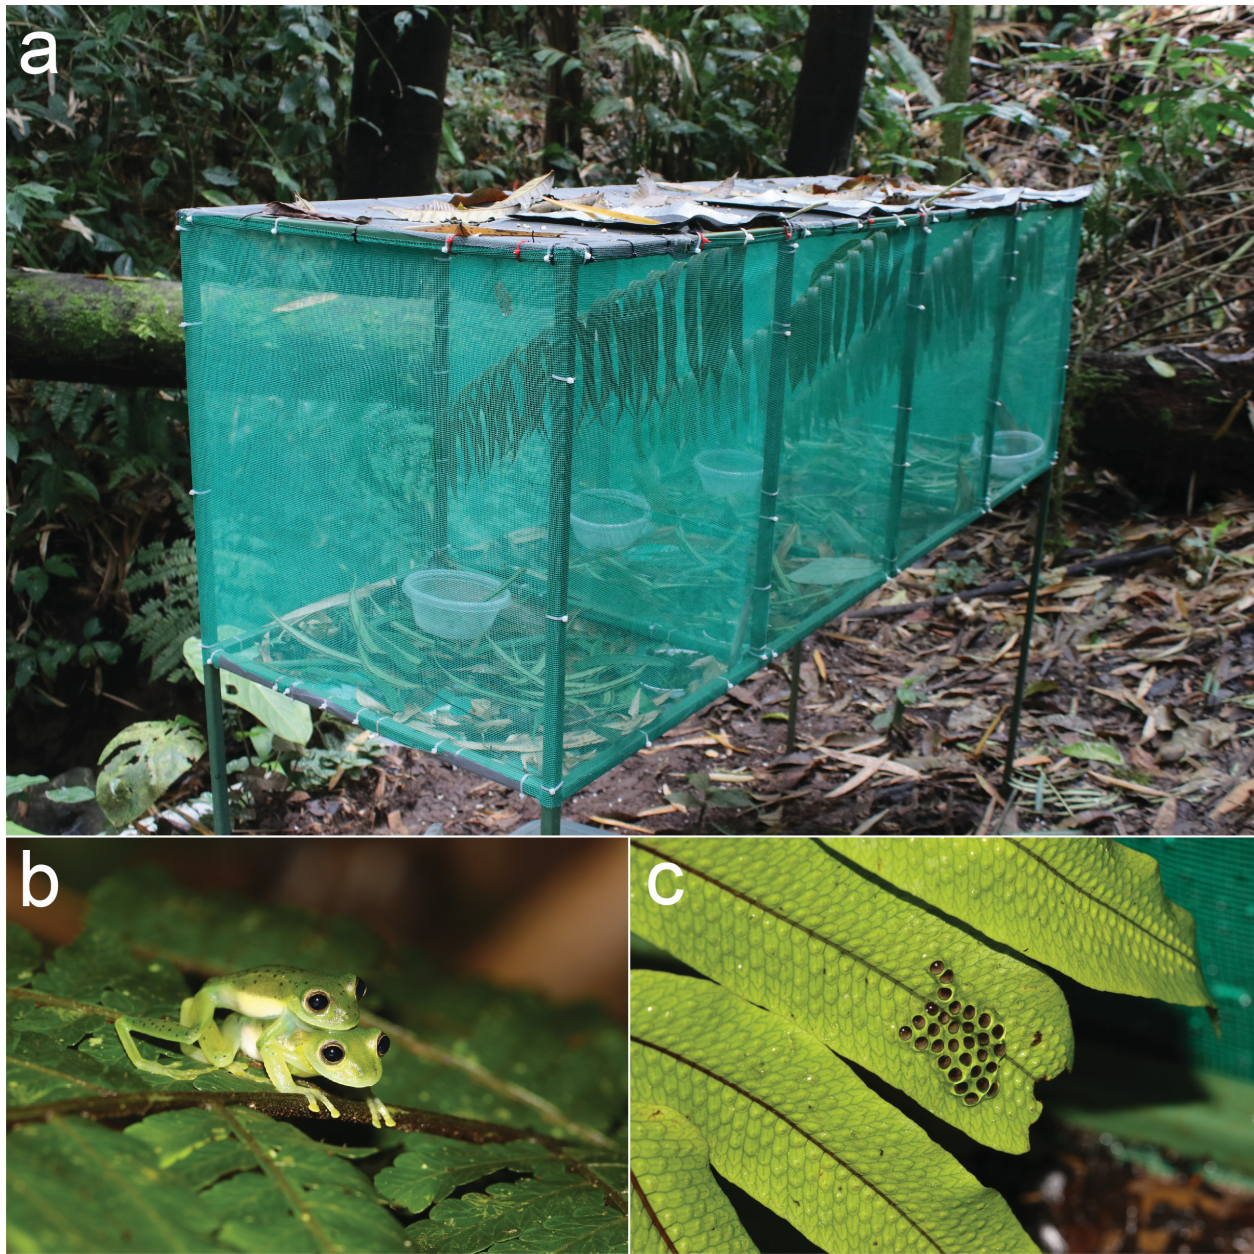

**Supplemental Figure 1.** (a) Setup of the semi-natural enclosure. The enclosure had four partitions adjacent to each other (38 x 50 x 75 cm) walled with green mesh. (b) A pair of *Espadarana prosoblepon* moving through the provided substrate inside the enclosure after capture and transportation. (c) A clutch of *E. prosoblepon*'s eggs laid on the provided substrate.
