# Supplementary material for: Influence of environmental factors and body condition on the post-oviposition behavior in the emerald glass frog Espadarana prosoblepon (Centrolenidae)
Source: PeerJ journal article supplement (doi:10.7717/peerj.13616), 2022-06-16
Supplement: Supplemental_Table_1.pdf [file Supplemental_Table_1.pdf]

**Table S1.** Summary of model comparison and Akaike information criterion (AIC<sub>c</sub>) values and  $\Delta$ AIC<sub>c</sub> values comparing different models examining the effect of environmental variables (temperature, humidity, mean wind speed, rainfall) on *Espadarana prosoblepon*'s post-oviposition behavior (POQ), using “cage number” as a random variable in all models.

|    | <b>Candidate models</b>                                                      | <b><i>k</i></b> | <b>AIC<sub>c</sub></b> | <b><math>\Delta</math>AIC<sub>c</sub></b> | <b><i>w<sub>i</sub></i></b> |
|----|------------------------------------------------------------------------------|-----------------|------------------------|-------------------------------------------|-----------------------------|
| 1  | POQ ~ rainfall + (1  cage number)                                            | 4               | 19.41                  | 0.00                                      | 0.34                        |
| 2  | POQ ~ 1 + (1  cage number)                                                   | 3               | 19.92                  | 0.50                                      | 0.27                        |
| 3  | POQ ~ temperature * rainfall + (1  cage number)                              | 6               | 21.67                  | 2.26                                      | 0.11                        |
| 4  | POQ ~ temperature + (1  cage number)                                         | 4               | 21.72                  | 2.30                                      | 0.11                        |
| 5  | POQ ~ humidity * rainfall + (1  cage number)                                 | 6               | 23.24                  | 3.82                                      | 0.05                        |
| 6  | POQ ~ mean wind speed + (1  cage number)                                     | 4               | 23.24                  | 3.83                                      | 0.05                        |
| 7  | POQ ~ humidity + (1  cage number)                                            | 4               | 23.41                  | 3.99                                      | 0.05                        |
| 8  | POQ ~ mean wind speed * rainfall + (1  cage number)                          | 6               | 26.76                  | 7.34                                      | 0.01                        |
| 9  | POQ ~ humidity * temperature + (1  cage number)                              | 6               | 27.15                  | 7.73                                      | 0.01                        |
| 10 | POQ ~ mean wind speed * temperature + (1  cage number)                       | 6               | 29.81                  | 10.39                                     | 0.00                        |
| 11 | POQ ~ rainfall + mean wind speed + temperature + humidity + (1  cage number) | 7               | 30.51                  | 11.10                                     | 0.00                        |
| 12 | POQ ~ mean wind speed * humidity + (1  cage number)                          | 6               | 31.70                  | 12.28                                     | 0.00                        |
