# Supplementary material for: Influence of environmental factors and body condition on the post-oviposition behavior in the emerald glass frog Espadarana prosoblepon (Centrolenidae)
Source: PeerJ journal article supplement (doi:10.7717/peerj.13616), 2022-06-16
Supplement: Supplemental_Table_2.pdf [file Supplemental_Table_2.pdf]

**Table S1. Summary of reproductive and behavioral biology parameters in *E. prosoblepon*.**

Parameters include female snout-vent length, amplexus duration, whether brooding behavior was observed, female coverage of the clutch, and the time females remained with their clutch (defined in this study as "post-oviposition quiescence period"). Table entries include “—” if not reported.

| Location               | N  | Female SVL (mm)               | Amplexus duration (h)      | Brooding behavior? | Clutch coverage?                                                            | Post-oviposition quiescence period (min) | Reference            |
|------------------------|----|-------------------------------|----------------------------|--------------------|-----------------------------------------------------------------------------|------------------------------------------|----------------------|
| Monteverde, Costa Rica | 9  | —                             | 2.9 ± 1.67<br>[1.25–5.35]  | No                 | Five females partially covering the clutch; four covering the entire clutch | 10–131                                   | Jacobson 1985        |
| Armenia, Colombia      | 9  | 29.88 ± 1.33<br>[27.54–31.84] | 3.76 ± 1.74<br>[0.51–6.05] | —                  | Partially covering the clutch                                               | 45–174                                   | Basto-Riascos et al. |
| —                      | 7  | —                             | —                          | Yes                | —                                                                           | 80–97                                    | Delia et al. 2017    |
| San Vito, Costa Rica   | 20 | 23.3 ± 1.1<br>[21.2–25.0]     | 5.8 ± 1.4<br>[3.6–7.8]     | No                 | Partially covering the clutch                                               | 22–158                                   | This study           |
